# Supplementary material for: Comparative transcriptome and proteome analysis to reveal the biosynthesis of gold nanoparticles in Arabidopsis
Source: PubMed Central journal article supplement (PMC4763195; doi:10.1038/srep21733), 2016-02-23
Supplement: srep21733-s1.pdf [file srep21733-s1.pdf]

**Comparative transcriptome and proteome analysis to reveal the biosynthesis of gold nanoparticles in Arabidopsis**

Manish Tiwari, Sneha Krishnamurthy, Devesh Shukla, Jeffrey Kiiskila<sup>1</sup>, Ajay Jain<sup>2</sup>, Rupali Datta<sup>1</sup>, Nilesh Sharma, Shivendra V. Sahi\*

Department of Biology, Western Kentucky University, 1906 College heights, Bowling Green, 42101-1080 Kentucky, USA

<sup>1</sup>Department of Biological Sciences, Michigan Technological University, Houghton, Michigan, USA

<sup>2</sup>National Research Centre on Plant Biotechnology, Lal Bahadur Shastri Building, Pusa Campus, New Delhi, 110012, India

\*Corresponding Author; **Phone:** 270 745-6012      **Fax:** 270 745-6856

**E-mail:** shiv.sahi@wku.edu

**Supplementary Figure 1: GO term enrichment of differentially expressed genes**

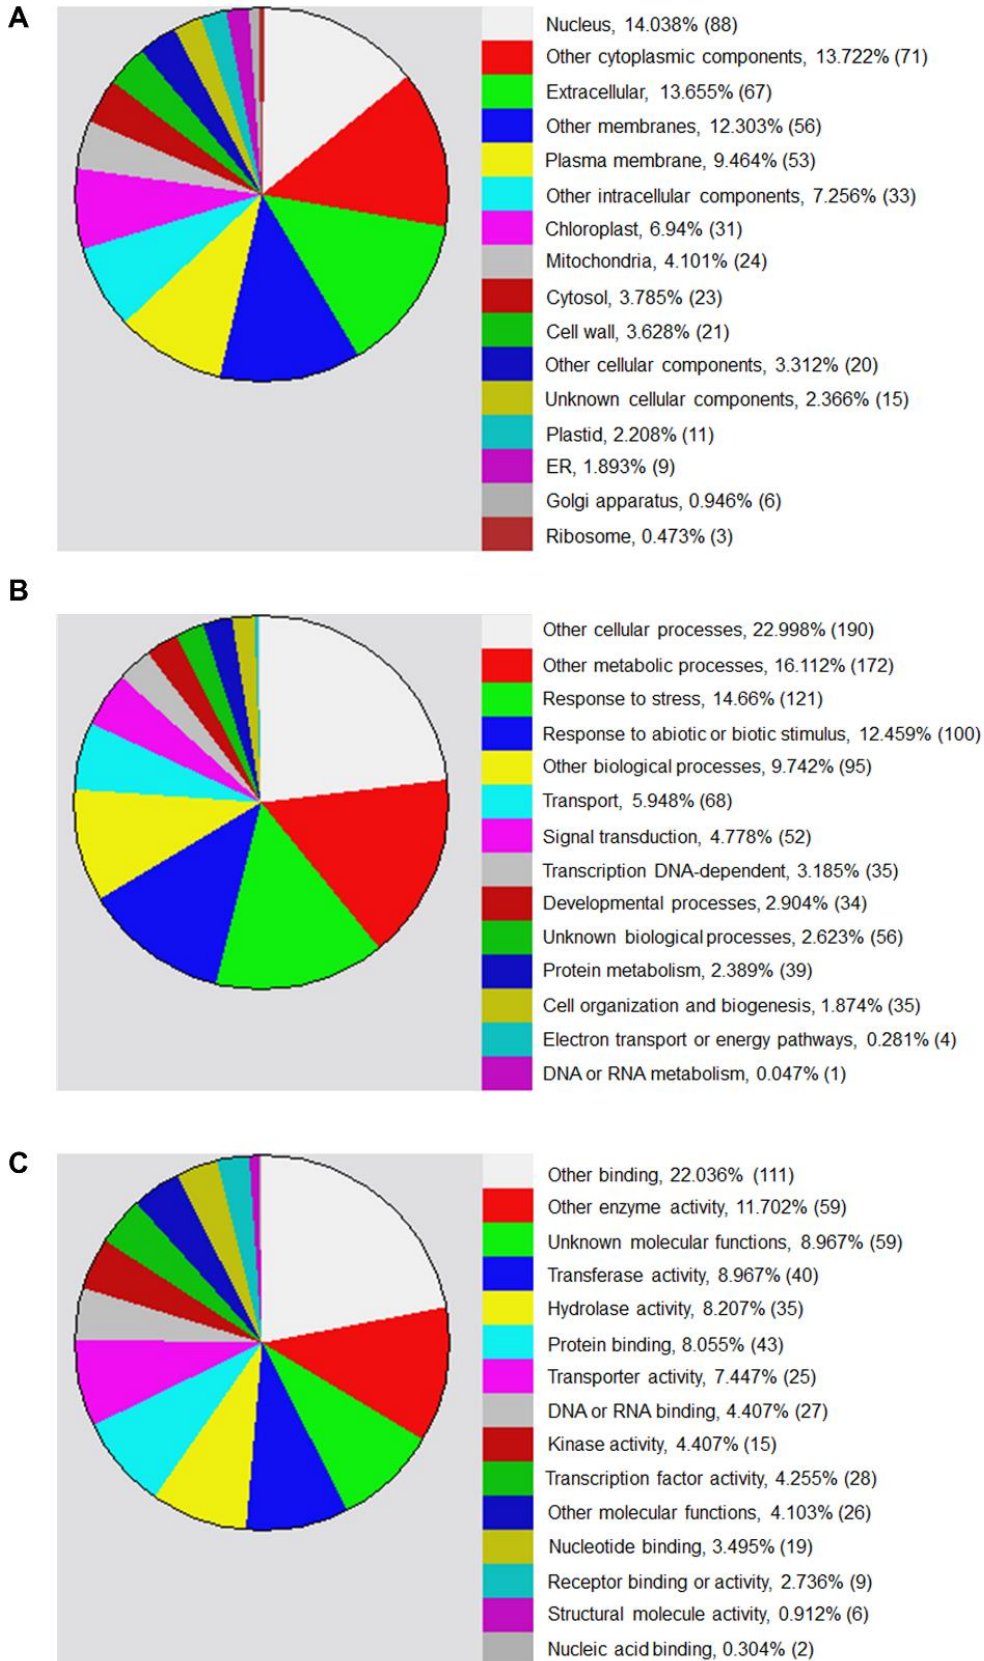

**Supplementary Figure 2:** Distribution of upregulated genes based on metal responsive nature

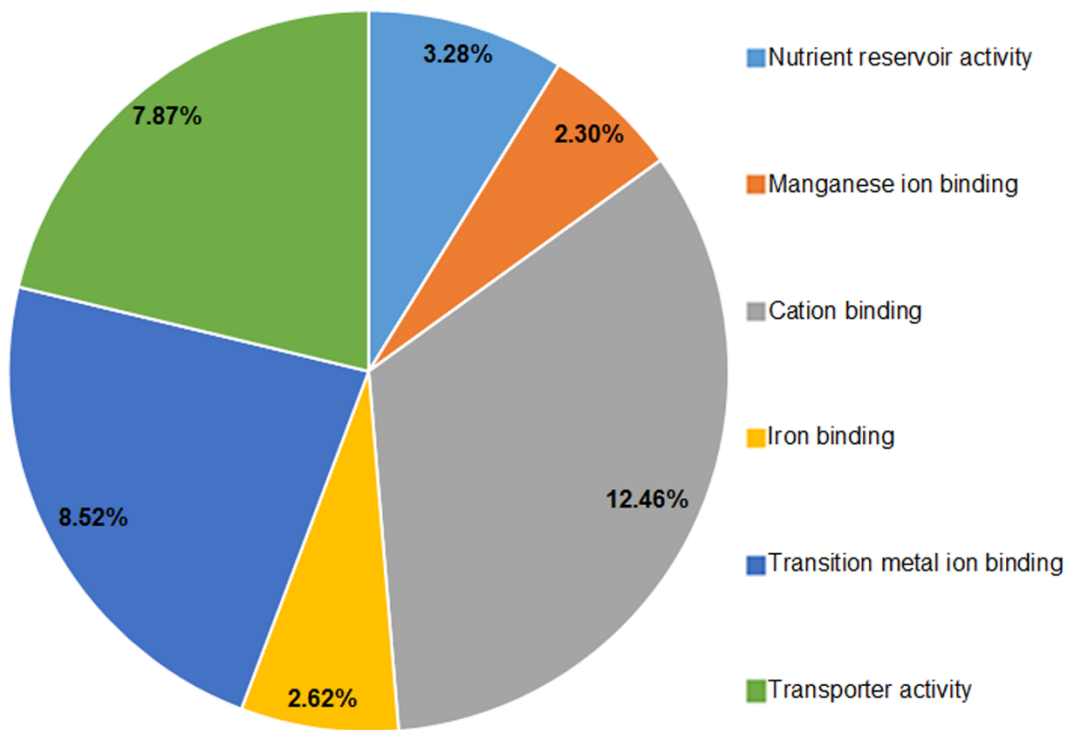

**Supplementary Table 1:** GO slim molecular function categorization of upregulated genes through Plant Gene Set Enrichment Analysis

| <b>Gene set name (no. of genes)</b>                                                                         | <b>Description</b>                                                                                                                           | <b>Gene number in overlap</b> | <b>P value</b> | <b>FDR</b> |
|-------------------------------------------------------------------------------------------------------------|----------------------------------------------------------------------------------------------------------------------------------------------|-------------------------------|----------------|------------|
| Iron ion binding (499)                                                                                      | GO:0005506 iron ion binding, GO slim:molecular function                                                                                      | 8                             | 3.13e-05       | 0.0214     |
| Transcription regulator activity (1738)                                                                     | GO:0030528 transcription regulator activity, GO slim:molecular function                                                                      | 14                            | 6.85e-05       | 0.0234     |
| Oxidoreductase activity, oxidizing metal ions, NAD or NADP as acceptor (8)                                  | GO:0016723 oxidoreductase activity, oxidizing metal ions, NAD or NADP as acceptor, GO slim:molecular function                                | 2                             | 2.58e-4        | 0.0293     |
| Ferric chelate reductase activity (8)                                                                       | GO:0000293 ferric-chelate reductase activity, GO slim:molecular function                                                                     | 2                             | 2.58e-4        | 0.0293     |
| Oxidoreductase activity, acting on paired donors, with incorporation or reduction of molecular oxygen (461) | GO:0016705 oxidoreductase activity, acting on paired donors, with incorporation or reduction of molecular oxygen, GO slim:molecular function | 7                             | 1.41e-4        | 0.0293     |

**Supplementary Table 2:** GO slim molecular function categorization of downregulated genes through Plant Gene Set Enrichment Analysis

| Gene set name (no. of genes)        | Description                                                            | Gene number in Overlap | P value  | FDR      |
|-------------------------------------|------------------------------------------------------------------------|------------------------|----------|----------|
| Nutrient reservoir activity (67)    | GO:0045735 nutrient reservoir activity,<br>GO slim:molecular_function  | 9                      | 2.63e-11 | 3.11e-08 |
| Manganese ion binding (46)          | GO:0030145 manganese ion binding,<br>GOslim:molecular_function         | 7                      | 2.09e-09 | 1.23e-06 |
| Ion binding (3006)                  | GO:0043167 ion binding,<br>GOslim:molecular_function                   | 33                     | 1.04e-07 | 3.09e-05 |
| Cation binding (3005)               | GO:0043169 cation binding,<br>GO slim:molecular_function               | 33                     | 1.04e-07 | 3.09e-05 |
| O-methyltransferase activity (34)   | GO:0008171 O-methyltransferase activity,<br>GOslim:molecular_function  | 5                      | 5.38e-07 | 1.27e-4  |
| Metal ion binding (2829)            | GO:0046872 metal ion binding,<br>GOslim:molecular_function             | 30                     | 9.78e-07 | 1.93e-4  |
| Chitinase activity (24)             | GO:0004568 chitinase activity,<br>GO slim:molecular_function           | 4                      | 5.02e-06 | 8.48e-4  |
| Heme binding (373)                  | GO:0020037 heme binding,<br>GOslim:molecular_function                  | 9                      | 2.83e-05 | 4.18e-3  |
| Catalytic activity (8725)           | GO:0003824 catalytic activity,<br>GO slim:molecular_function           | 57                     | 3.31e-05 | 4.35e-3  |
| Tetrapyrrole binding (406)          | GO:0046906 tetrapyrrole binding,<br>GO slim:molecular_function         | 9                      | 5.37e-05 | 6.35e-3  |
| Transition metal ion binding (2298) | GO:0046914 transition metal ion binding,<br>GO slim:molecular_function | 22                     | 1.63e-4  | 0.0175   |
| Iron ion binding (499)              | GO:0005506 iron ion binding,<br>GO slim:molecular_function             | 9                      | 2.46e-4  | 0.0242   |

|                                 |                                                                    |    |    |         |        |
|---------------------------------|--------------------------------------------------------------------|----|----|---------|--------|
| Antioxidant activity (142)      | GO:0016209 antioxidant activity,<br>slim:molecular_function        | GO | 5  | 3.51e-4 | 0.0297 |
| Electron carrier activity (522) | GO:0009055 electron carrier activity,<br>GOslim:molecular_function |    | 9  | 3.4e-4  | 0.0297 |
| Binding (11174)                 | GO:0005488 binding,<br>slim:molecular_function                     | GO | 64 | 5.08e-4 | 0.0401 |

---

**Supplementary Table 3:** List of Au responsive upregulated genes in microarray analysis

| <b>S.N.</b> | <b>Locus ID</b> | <b>Gene Annotation</b>                                   | <b>Fold-Change</b> |
|-------------|-----------------|----------------------------------------------------------|--------------------|
| 1.          | AT5G23990       | Ferric reduction oxidase 5                               | 17.5377            |
| 2.          | AT1G52820       | 2-oxoglutarate-dependent dioxygenase                     | 6.10238            |
| 3.          | AT5G04120       | Phosphoglycerate mutase-like protein                     | 5.37988            |
| 4.          | AT1G18870       | Isochorismate synthase 2                                 | 4.97757            |
| 5.          | AT1G71200       | Basic helix-loop-helix domain-containing protein         | 4.97558            |
| 6.          | AT3G12320       | Light-inducible and clock-regulated 3, LNK3              | 4.80791            |
| 7.          | AT1G26790       | Dof-type zinc finger domain-containing protein           | 4.33402            |
| 8.          | AT3G46900       | Copper transporter 2                                     | 4.21698            |
| 9.          | AT5G14570       | High affinity nitrate transporter 2.7                    | 3.8982             |
| 10.         | AT2G46830       | CCA1, Myb family                                         | 3.87975            |
| 11.         | AT1G63950       | Heavy-metal-associated domain-containing protein         | 3.83307            |
| 12.         | AT4G28790       | bHLH23 transcription factor                              | 3.78458            |
| 13.         | AT1G33730       | Cytochrome P450, family 76, C5, CYP76C5                  | 3.77075            |
| 14.         | AT2G16005       | MD-2-related lipid recognition domain-containing protein | 3.70453            |
| 15.         | AT1G01060       | Late elongated hypocotyl protein, Myb family             | 3.59428            |
| 16.         | AT5G23980       | Ferric reduction oxidase 4                               | 3.56527            |
| 17.         | AT5G59520       | Zinc transporter 2                                       | 3.31975            |
| 18.         | AT4G21680       | Nitrate transporter 1.8                                  | 3.26447            |
| 19.         | AT2G38255       | Hypothetical protein                                     | 3.24975            |
| 20.         | AT3G28345       | ABC transporter B family member 15                       | 3.102              |
| 21.         | AT5G24380       | Metal-nicotianamine transporter YSL2                     | 2.9997             |
| 22.         | AT5G03545       | Hypothetical protein                                     | 2.99139            |
| 23.         | AT5G17300       | Reveille 1 protein, Myb family                           | 2.91968            |
| 24.         | AT1G47510       | Inositol polyphosphate 5-phosphatase 11                  | 2.87279            |
| 25.         | AT5G15948       | S-adenosylmethionine decarboxylase-like protein          | 2.79225            |
| 26.         | AT3G22550       | Hypothetical protein                                     | 2.76846            |
| 27.         | AT2G31380       | Salt tolerance-like protein                              | 2.72006            |
| 28.         | AT2G46790       | Two-component response regulator-like APRR9              | 2.70904            |
| 29.         | AT4G22210       | Defensin-like protein 97                                 | 2.7019             |
| 30.         | AT1G06100       | Delta-9 desaturase-like 2 protein                        | 2.67852            |
| 31.         | AT1G07610       | Metallothionein 1C                                       | 2.63142            |
| 32.         | AT4G11210       | Dirigent domain-containing protein                       | 2.60236            |
| 33.         | AT5G54470       | B-box type zinc finger-containing protein                | 2.5976             |
| 34.         | AT5G06980       | Hypothetical protein                                     | 2.59096            |
| 35.         | AT1G75830       | Defensin-like protein 13                                 | 2.55809            |
| 36.         | AT5G37260       | Reveille 2 protein, Myb family                           | 2.53845            |
| 37.         | AT1G18290       | Hypothetical protein                                     | 2.51045            |
| 38.         | AT1G34510       | Peroxidase 8                                             | 2.4756             |
| 39.         | AT4G25100       | Superoxide dismutase [Fe]                                | 2.44342            |
| 40.         | AT1G08430       | Aluminum-activated malate transporter 1                  | 2.37952            |

|     |           |                                                          |         |
|-----|-----------|----------------------------------------------------------|---------|
| 41. | AT1G53540 | HSP20-like chaperone                                     | 2.37592 |
| 42. | AT4G11880 | Agamous-like MADS-box protein AGL14                      | 2.36954 |
| 43. | AT3G09600 | Myb family transcription factor                          | 2.36651 |
| 44. | AT5G06900 | Cytochrome P450, family 93, subfamily D                  | 2.31686 |
| 45. | AT5G36130 | Cytochrome P450 family protein                           | 2.30527 |
| 46. | AT4G11190 | Dirigent domain-containing protein                       | 2.26673 |
| 47. | AT3G09922 | Induced by phosphate starvation1                         | 2.2666  |
| 48. | AT2G31083 | CLAVATA3 protein                                         | 2.25834 |
| 49. | AT1G68740 | Phosphate transporter PHO1-1                             | 2.25428 |
| 50. | AT3G13840 | Scarecrow-like protein 29                                | 2.24667 |
| 51. | AT5G62430 | Dof zinc finger protein DOF5.5                           | 2.24577 |
| 52. | AT5G25460 | Hypothetical protein                                     | 2.23767 |
| 53. | AT4G13390 | Proline-rich extensin-like family protein                | 2.19473 |
| 54. | AT3G49620 | 2-oxoglutarate-Fe(II)-dependent oxygenase                | 2.16134 |
| 55. | AT2G25160 | Cytochrome P450, family 82, subfamily F                  | 2.15761 |
| 56. | AT3G16800 | Protein phosphatase 2C 41                                | 2.14452 |
| 57. | AT1G60450 | Galactinol synthase 7                                    | 2.1428  |
| 58. | AT2G21210 | SAUR-like auxin-responsive protein                       | 2.11956 |
| 59. | AT5G63190 | MA3 domain-containing protein                            | 2.09843 |
| 60. | AT5G48010 | Thalianol synthase 1                                     | 2.08992 |
| 61. | AT3G47420 | Phosphate starvation-induced protein                     | 2.08306 |
| 62. | AT5G02020 | Hypothetical protein                                     | 2.07093 |
| 63. | AT2G24980 | Proline-rich extensin-like family protein                | 2.06656 |
| 64. | AT1G23450 | Pentatricopeptide repeat-containing protein-like protein | 2.03601 |
| 65. | AT4G13420 | Potassium transporter 5                                  | 2.0341  |
| 66. | AT2G25150 | HXXXD-type acyl-transferase-like protein                 | 2.02808 |
| 67. | AT3G29780 | Protein ralf-like 27                                     | 2.02344 |
| 68. | AT4G12490 | Seed storage 2S albumin superfamily protein              | 2.01751 |
| 69. | AT4G15550 | Indole-3-acetate beta-D-glucosyltransferase              | 2.00635 |
| 70. | AT4G02170 | Hypothetical protein                                     | 2.00502 |

---



**Supplementary Table 4:** List of Au responsive downregulated genes in microarray analysis

| <b>S.N.</b> | <b>Locus ID</b> | <b>Gene Annotation</b>                                | <b>Fold-Change</b> |
|-------------|-----------------|-------------------------------------------------------|--------------------|
| 1.          | AT4G31970       | Cytochrome P450, family 82, subfamily C               | -13.2573           |
| 2.          | AT5G38910       | Germin-like protein subfamily 1 member 9              | -12.8769           |
| 3.          | AT5G40990       | GDSL esterase lipase 1                                | -12.5087           |
| 4.          | AT2G30750       | Cytochrome P450 71A12                                 | -11.2062           |
| 5.          | AT3G05950       | Germin-like protein subfamily 1 member 7              | -10.8316           |
| 6.          | AT1G26240       | Proline-rich extensin-like family protein             | -10.3365           |
| 7.          | AT3G60270       | Uclacyanin                                            | -9.85822           |
| 8.          | AT2G30660       | 3-hydroxyisobutyryl-CoA hydrolase                     | -8.3746            |
| 9.          | AT4G13300       | Terpenoid synthase 13                                 | -7.67573           |
| 10.         | AT5G42530       | Hypothetical protein                                  | -7.59356           |
| 11.         | AT2G43000       | NAC domain-containing protein 42                      | -7.20664           |
| 12.         | AT4G10530       | Subtilase family protein                              | -6.85105           |
| 13.         | AT2G30770       | Cytochrome P450, family 71, subfamily A               | -6.63149           |
| 14.         | AT1G15125       | S-adenosyl-L-methionine-dependent methyltransferase   | -6.52484           |
| 15.         | AT2G02930       | Glutathione S-transferase 16                          | -6.44904           |
| 16.         | AT3G03670       | Peroxidase                                            | -6.28715           |
| 17.         | AT5G52710       | Copper transport family protein                       | -5.85748           |
| 18.         | AT1G21120       | O-methyltransferase family protein                    | -5.77294           |
| 19.         | AT5G52670       | Copper transport protein                              | -5.73767           |
| 20.         | AT5G44585       | Hypothetical protein                                  | -5.425             |
| 21.         | AT5G57220       | Cytochrome P450, family 81, subfamily F               | -5.26538           |
| 22.         | AT5G64120       | Peroxidase 71                                         | -5.22024           |
| 23.         | AT1G26410       | FAD-binding and BBE domain-containing protein         | -5.207             |
| 24.         | AT4G19760       | Glycosyl hydrolase family protein                     | -5.15035           |
| 25.         | AT5G39120       | Germin-like protein subfamily 1 member 15             | -5.07603           |
| 26.         | AT1G21110       | O-methyltransferase family protein                    | -4.87295           |
| 27.         | AT4G14630       | Germin-like protein subfamily 1 member 8              | -4.76824           |
| 28.         | AT1G74080       | Myb domain protein 122                                | -4.59534           |
| 29.         | AT1G57630       | Toll-Interleukin-Resistance domain-containing protein | -4.50851           |
| 30.         | AT4G19750       | Glycosyl hydrolase family protein                     | -4.49295           |
| 31.         | AT2G43510       | Defensin-like protein 195                             | -4.35663           |
| 32.         | AT1G31580       | ECS1 protein                                          | -4.30711           |
| 33.         | AT4G18250       | Receptor serine threonine kinase                      | -4.26378           |
| 34.         | AT5G60100       | Two-component response regulator-like APRR3           | -4.21684           |
| 35.         | AT3G12230       | Serine carboxypeptidase-like 14                       | -4.13825           |
| 36.         | AT1G08090       | Nitrate transporter 2:1                               | -4.10797           |
| 37.         | AT1G21130       | O-methyltransferase-like protein                      | -4.07761           |
| 38.         | AT1G02920       | Glutathione S-transferase 11                          | -4.03949           |
| 39.         | AT2G43570       | Chitinase class 4-like protein                        | -3.9401            |
| 40.         | AT1G05880       | E3 ubiquitin-protein ligase ARI12                     | -3.92679           |

|     |           |                                                     |          |
|-----|-----------|-----------------------------------------------------|----------|
| 41. | AT4G15990 | Hypothetical protein                                | -3.90724 |
| 42. | AT4G16860 | TIR-NBS-LRR class protein                           | -3.89922 |
| 43. | AT5G48430 | Aspartyl protease family protein                    | -3.87418 |
| 44. | AT4G04990 | Hypothetical protein                                | -3.85765 |
| 45. | AT4G19720 | Glycosyl hydrolase family protein                   | -3.746   |
| 46. | AT1G67980 | Caffeoyl-CoA 3-O-methyltransferase                  | -3.71791 |
| 47. | AT2G33770 | Ubiquitin-conjugating enzyme E2                     | -3.68801 |
| 48. | AT1G21230 | Wall-associated receptor kinase 5                   | -3.65012 |
| 49. | AT1G08830 | Superoxide dismutase (Cu-Zn)                        | -3.62763 |
| 50. | AT4G36410 | Ubiquitin-conjugating enzyme E2 17                  | -3.58101 |
| 51. | AT2G38600 | HAD superfamily, subfamily IIIB acid phosphatase    | -3.52082 |
| 52. | AT2G26560 | Phospholipase A 2A                                  | -3.51641 |
| 53. | AT2G30670 | Tropine dehydrogenase                               | -3.4913  |
| 54. | AT1G18970 | Germin-like protein subfamily T member 1            | -3.46163 |
| 55. | AT5G38540 | Jacalin lectin family protein                       | -3.43039 |
| 56. | AT1G26250 | Proline-rich extensin-like family protein           | -3.38242 |
| 57. | AT5G47240 | Nudix hydrolase 8                                   | -3.38169 |
| 58. | AT5G59680 | Leucine-rich repeat protein kinase-like protein     | -3.37181 |
| 59. | AT4G23700 | Cation H(+) antiporter 17                           | -3.36662 |
| 60. | AT5G26690 | Heavy-metal-associated domain-containing protein    | -3.22911 |
| 61. | AT2G21900 | WRKY transcription factor 59                        | -3.22178 |
| 62. | AT4G10860 | Hypothetical protein                                | -3.15932 |
| 63. | AT1G02930 | Glutathione S-transferase 1                         | -3.12612 |
| 64. | AT5G43650 | bHLH92                                              | -3.10083 |
| 65. | AT5G42830 | HXXXD-type acyl-transferase-like protein            | -3.08226 |
| 66. | AT5G41080 | Glycerophosphoryl diester phosphodiesterase protein | -3.07135 |
| 67. | AT2G23270 | Hypothetical protein                                | -2.9786  |
| 68. | AT1G64370 | Hypothetical protein                                | -2.94879 |
| 69. | AT5G01900 | WRKY transcription factor 62                        | -2.92625 |
| 70. | AT1G52130 | Mannose-binding lectin-like protein                 | -2.9198  |
| 71. | AT4G14680 | 3'-phosphoadenosine 5'-phosphosulfate synthase      | -2.8995  |
| 72. | AT2G40080 | Hypothetical protein                                | -2.89458 |
| 73. | AT1G64170 | Cation H(+) antiporter 16                           | -2.89    |
| 74. | AT5G40010 | AAA-ATPase 1                                        | -2.86254 |
| 75. | AT1G26380 | FAD-binding and BBE domain-containing protein       | -2.85807 |
| 76. | AT5G25250 | Flotillin-like protein 1                            | -2.85524 |
| 77. | AT5G11920 | beta-fructofuranosidase                             | -2.85436 |
| 78. | AT2G23030 | Serine threonine-protein kinase, SRK2J              | -2.85078 |
| 79. | AT1G14540 | Peroxidase 4                                        | -2.81827 |
| 80. | AT5G56960 | Putative transcription factor bHLH041               | -2.81712 |
| 81. | AT5G52720 | Copper transport family protein                     | -2.81608 |
| 82. | AT2G39400 | Alpha beta-hydrolase domain-containing protein      | -2.80153 |
| 83. | AT1G32350 | Alternative oxidase 3                               | -2.79736 |

|      |           |                                                  |          |
|------|-----------|--------------------------------------------------|----------|
| 84.  | AT5G49770 | Leucine-rich repeat receptor-like protein kinase | -2.7882  |
| 85.  | AT5G39150 | Germin-like protein subfamily 1 member 17        | -2.78272 |
| 86.  | AT5G14760 | L-aspartate oxidase                              | -2.78187 |
| 87.  | AT4G33050 | Calmodulin-binding protein                       | -2.74687 |
| 88.  | AT1G79680 | Wall-associated receptor kinase-like 10          | -2.74338 |
| 89.  | AT4G24350 | Phosphorylase family protein                     | -2.7329  |
| 90.  | AT4G27850 | Glycine-rich family protein                      | -2.73115 |
| 91.  | AT1G04370 | Ethylene-responsive transcription factor 14      | -2.70828 |
| 92.  | AT5G19890 | Peroxidase 59                                    | -2.69694 |
| 93.  | AT3G56950 | Galactinol--sucrose galactosyltransferase 2      | -2.69226 |
| 94.  | AT1G67870 | Glycine-rich protein                             | -2.67387 |
| 95.  | AT5G21960 | Ethylene-responsive transcription factor ERF016  | -2.64697 |
| 96.  | AT1G30370 | Lipase-3 domain-containing protein               | -2.63567 |
| 97.  | AT1G19250 | Flavin-containing monooxygenase 1                | -2.61705 |
| 98.  | AT3G28510 | AAA-type ATPase family protein                   | -2.60891 |
| 99.  | AT5G44990 | Glutathione S-transferase family protein         | -2.60543 |
| 100. | AT1G19610 | Defensin-like protein 19                         | -2.60311 |
| 101. | AT5G46050 | Peptide transporter PTR3-A                       | -2.60253 |
| 102. | AT5G38940 | Germin-like protein subfamily 1 member 11        | -2.59104 |
| 103. | AT3G01175 | Hypothetical protein                             | -2.56899 |
| 104. | AT4G22690 | Cytochrome P450, family 706, subfamily A         | -2.56516 |
| 105. | AT2G33830 | Dormancy auxin associated protein                | -2.56427 |
| 106. | AT1G21100 | O-methyltransferase-like protein                 | -2.5576  |
| 107. | AT4G24015 | RING-H2 zinc finger protein RHA4a                | -2.54901 |
| 108. | AT1G33790 | Jacalin lectin family protein                    | -2.54856 |
| 109. | AT3G63380 | Ca <sup>2+</sup> -transporting ATPase            | -2.54321 |
| 110. | AT1G33900 | Avirulence-responsive protein                    | -2.53974 |
| 111. | AT1G51920 | Hypothetical protein                             | -2.5385  |
| 112. | AT5G02780 | Glutathione transferase lambda 1                 | -2.5356  |
| 113. | AT4G37290 | Hypothetical protein                             | -2.53243 |
| 114. | AT4G32950 | Protein phosphatase 2C 61                        | -2.53042 |
| 115. | AT5G02490 | Heat shock protein 70                            | -2.5276  |
| 116. | AT1G54950 | Hypothetical protein                             | -2.51776 |
| 117. | AT3G12580 | Heat shock protein 70-4                          | -2.50915 |
| 118. | AT5G13320 | Auxin-responsive GH3 family protein              | -2.50371 |

---

**Supplementary Table 5:** *cis*- regulatory motif prediction in 1 kb upstream sequences of GSTs through Plant Cis-acting Regulatory DNA Elements

| Promoter | Locus     | Site name | Position   | Strand | Sequence | Function                                                        |
|----------|-----------|-----------|------------|--------|----------|-----------------------------------------------------------------|
| GSTF6    | AT1G02930 | ABRE      | 87         | +      | TACGGTC  | cis-acting element involved in the abscisic acid responsiveness |
| GST11    | AT1G02920 | W box     | 698        | +      | TTGACC   | MYB binding site involved in drought-inducibility               |
|          |           | W box     | 285        | +      | TTGACC   |                                                                 |
|          |           | W box     | 728        | -      | TTGACC   |                                                                 |
|          |           | MBS       | 87         | +      | TAACTG   |                                                                 |
| GST16    | AT2G02930 | ABRE      | 60         | +      | ACGTGGC  | cis-acting element involved in the abscisic acid responsiveness |
|          |           | MRE       | 497        | -      | AACCTAA  | MYB binding site involved in light responsiveness               |
| GSTL1    | AT5G02780 | MBS       | 750        | +      | CAACTG   | MYB binding site involved in drought-inducibility               |
|          |           | W box     | 27         | +      | TTGACC   |                                                                 |
| GST      | AT5G44990 | W box     | 826<br>806 | -      | TTGACC   |                                                                 |

**Supplementary Table 6:** List of details about oligonucleotides with sequences used in the study

| <b>S.N.</b> | <b>Primer name</b> | <b>Primer sequences (5'-3')</b> |
|-------------|--------------------|---------------------------------|
| 1.          | FRO5 F             | GACCCCAAACCTCGCCAAGCAT          |
| 2.          | FRO5 R             | TCATCACCCCTCCCCATTCTCCC         |
| 3.          | CCA1 F             | ACGTGAAAGGTGGACTGAGGAA          |
| 4.          | CCA1 R             | GCTTCAGCCTCTTTCTCTACCTTGG       |
| 5.          | NRT2.7 F           | TGGCTGGGTTGTTGTGCGTG            |
| 6.          | NRT2.7 R           | CCTAACGATCGCGTGGAGACG           |
| 7.          | LHY F              | TCGGCCTCTTCTTCACAGTTGA          |
| 8.          | LHY R              | CGCCACTTACCTGTTTCGTTGGT         |
| 9.          | CYP76C5 F          | CCTCCAAGAAAAGCGGAAAGGG          |
| 10.         | CYP76C5 R          | TGGGTCTCGTCCTATGGCCC            |
| 11.         | YSL2 F             | TATCCTAGTGGAACGGCAACAGC         |
| 12.         | YSL2 R             | AAACCCGCGAATCTGTTTCTTGGC        |
| 13.         | RVE1 F             | GCGTCGTCTCCGTTGACTGC            |
| 14.         | RVE1 R             | GGCTTCCGTACCTTGGGTGC            |
| 15.         | ERF13 F            | GCTGGACACCCTCCGTTCT             |
| 16.         | ERF13 R            | CACGGCCTCCTCCTCACTCC            |
| 17.         | COPT2 F            | CCTCCTCGCCGTAATTGCCGA           |
| 18.         | COPT2 R            | CACAGCGGTTTGAGCGAGCC            |
| 19.         | MYB F              | GGCATGGGAAGCTCAAGCCG            |
| 20.         | MYB R              | AGGAACACCGTGAAGCACTGGA          |
| 21.         | LRR-RLK F          | TTTGCCAAGTGGGATGCGGG            |
| 22.         | LRR-RLK R          | GGCCATAACCTCCACCGCCA            |
| 23.         | LNK3 F             | GTCTTTCAAGGAGGAAGCTCCA          |
| 24.         | LNK3 R             | CCCGGAAACATTTGCGTGTCT           |
| 25.         | ABCB F             | TGGTGCTCAGGGTGGTACTGT           |
| 26.         | ABCB R             | ACCACCACCAAGTGATACGCCA          |
| 27.         | SUBTIL F           | ATGGCACGCATGTTGCCTCG            |
| 28.         | SUBTIL R           | ACATCAGCTCCCGAACACCCT           |
| 29.         | HMA3 F             | CTGACTTACCCGGAATTCCTC           |
| 30.         | HMA3 R             | TCCCTCTTCTGCTTAGCCTCA           |
